# Supplementary material
Source: publisher figshare collection journal article supplement (https://acs.figshare.com/ndownloader/files/3912190)
Supplement: Supplementary file 1 [file 3912190]

## Supporting Information

### Improved Performance of Solution-Processed n-Type Organic Field-Effect Transistors by Regulating the Intermolecular Interactions and Crystalline Domains on Macroscopic Scale

V. Suresh,<sup>a</sup> Satyaprasad P. Senanayak,<sup>b</sup> Meenakshi Sharma,<sup>a</sup> K. S. Narayan<sup>b\*</sup> and Parameswar K. Iyer<sup>a,c\*</sup>

<sup>a</sup>Department of Chemistry, Indian Institute of Technology Guwahati, Guwahati-781039. India.  
Fax: +913612582349; Tel: +913612582314; E-mail: [pki@iitg.ernet.in](mailto:pki@iitg.ernet.in)

<sup>b</sup>Jawaharlal Nehru Centre for Advanced Scientific Research Jakkur, Bangalore 560064. India.  
Fax: +91 8022082750; Tel: +918022082822; E-mail: [narayan@jncasr.ac.in](mailto:narayan@jncasr.ac.in)

<sup>c</sup>Centre for Nanotechnology, Indian Institute of Technology Guwahati, Guwahati-781039. India.

| No. | Contents                                                   | Page  |
|-----|------------------------------------------------------------|-------|
| 1.  | Synthesis of monomers and Polymers                         | S2-S4 |
| 2.  | <sup>1</sup> H NMR Spectra of <b>Br<sub>2</sub>-NDIOD</b>  | S4    |
| 3.  | <sup>13</sup> C NMR Spectra of <b>Br<sub>2</sub>-NDIOD</b> | S5    |
| 4.  | MALDI-TOF Spectra <b>Br<sub>2</sub>-NDIOD</b>              | S6    |
| 5.  | <sup>1</sup> H NMR Spectra of <b>NDI-Ph</b>                | S7    |
| 6.  | <sup>13</sup> C NMR Spectra of <b>NDI-Ph</b>               | S8    |
| 7.  | <sup>1</sup> H NMR Spectra of <b>NDI-BT</b>                | S9    |
| 8.  | <sup>13</sup> C NMR Spectra of <b>NDI-BT</b>               | S10   |
| 9.  | <sup>1</sup> H NMR Spectra of <b>Br<sub>2</sub>-PDIOD</b>  | S11   |
| 10. | <sup>13</sup> C NMR Spectra of <b>Br<sub>2</sub>-PDIOD</b> | S12   |
| 11. | MALDI-TOF Spectra <b>Br<sub>2</sub>-PDIOD</b>              | S13   |
| 12. | <sup>1</sup> H NMR Spectra of <b>PDI-Ph</b>                | S14   |
| 13. | <sup>13</sup> C NMR Spectra of <b>PDI-Ph</b>               | S15   |

|     |                                                                                                                 |          |
|-----|-----------------------------------------------------------------------------------------------------------------|----------|
| 14. | <sup>1</sup> H NMR Spectra of <b>PDI-BT</b>                                                                     | S16      |
| 15. | <sup>13</sup> C NMR Spectra of <b>PDI-BT</b>                                                                    | S17      |
| 16. | XRD spectra of the films                                                                                        | S17, S18 |
| 17. | Table showing the variation in the FWHM of the XRD spectra with annealing of the polymer films                  | S19      |
| 18. | Typical output and transconductance characteristics for FETs fabricated with (a) NDI-BT, (b) PDI-BT (c) N2200   | S19, S20 |
| 19. | Transconductance plot showing highest $\mu_{\text{FET}}$ for NDI-Ph and the performance under ambient condition | S21      |

## Synthesis of Monomers and Polymers

**Synthesis of Br<sub>2</sub>-NDIOD:** A mixture of NTCDA-Br<sub>2</sub> (0.4 g, 0.93 mmol) (*Precaution: The dibromination of NTCDA by dibromoisocyanuric acid has to be carried out in presence of concentrated H<sub>2</sub>SO<sub>4</sub> or Oleum and must be handled with great care*), 2-octyldodecylamine (0.629 g, 2.33 mmol), o-xylene (3 mL), and propionic acid (1 mL) were stirred at 140 °C for 6 h. After cooling to room temperature, most of solvents were removed in vacuo, and the residue was purified by column chromatography on silica gel with a mixture of chloroform : hexane (1:2, v/v) as eluent, affording the slightly yellowish red color solid as product (0.61 g, yield 70%). <sup>1</sup>H NMR (600 MHz, CDCl<sub>3</sub>,  $\delta$  ppm): 8.75 (s, 2H), 4.18 (t, 4H), 1.73 (m, 4H), 1.25-1.15 (m, 60H), 0.87 (t, 6H); <sup>13</sup>C NMR (150MHz, CDCl<sub>3</sub>,  $\delta$  ppm): 163.07, 139.28, 128.87, 128.54, 127.97, 125.60, 124.35, 41.85-14.32 (Aliphatic Carbons). MALDI-TOF: m/z Calcd. 928.41, found. [M+2H]<sup>+</sup>: 930.11; Elemental Analysis Calcd. C, 64.65; H, 8.25; N, 3.02; found, C, 64.16; H, 8.255; N, 1.46.

**Synthesis of NDI-Ph:** To a three neck round bottom flask Br<sub>2</sub>-NDIOD (0.1 g, 0.107 mmol) and benzene-1,4-diboronic acid (0.0177 g, 0.107 mmol), were added and degassed thrice by freeze thaw cycles. Aqueous solution of K<sub>2</sub>CO<sub>3</sub> (0.147 g, 1.07 mmol) in 2 mL deoxygenated water were added under nitrogen. (0.006 g, 0.004 mmol) of Pd(PPh<sub>3</sub>)<sub>4</sub>, two drops of aliquat and 6 mL THF were added under nitrogen atmosphere, degassed thrice by freeze thaw cycles (15 minutes each). The dark red solution was stirred at 80 °C for 36h. Phenyl boronic acid was added under nitrogen and the reaction was continued for other 12h. The brown sticky mixture was cooled to room temperature. The mixture was extracted with CHCl<sub>3</sub>, washed with 100 mL water thrice and dried over anh. MgSO<sub>4</sub>. The solution was concentrated to 5 mL and dropped in 50 mL methanol. The brown color precipitate was filtered and washed with methanol twice (0.076 g, Yield 84 %). <sup>1</sup>H NMR (400 MHz, CDCl<sub>3</sub>,  $\delta$  ppm): 8.5-8.8 (br, m, 2H), 7.4-7.8 (br, m, 4H), 4.0 (br, m, 4H), 1.67 (br, m, 4H), 1.2 (br, m, 60H), 0.87 (br, m, 6H); <sup>13</sup>C NMR (150MHz, CDCl<sub>3</sub>,  $\delta$  ppm): 163.06, 135.66, 132.00, 131.10, 128.76, 125.07, 124.68, 124.19, 41.14-14.32 (Aliphatic Carbons); GPC: Mn: 6811; Mw: 13579; PDI: 1.99.

**Synthesis of NDI-BT:** To a three neck round bottom flask, Br<sub>2</sub>-NDIOD (0.1 g, 0.107 mmol) and 2,1,3-benzothiadiazole bisboronic ester (0.0415 g, 0.107 mmol), were added and degassed thrice by freeze thaw cycles. Aqueous solution of K<sub>2</sub>CO<sub>3</sub> (0.147 g, 1.07 mmol) in 2 mL deoxygenated water was added under nitrogen flow. (0.006 g, 0.004 mmol) of Pd(PPh<sub>3</sub>)<sub>4</sub>, two drops of aliquat and 6 mL THF were added under nitrogen atmosphere, degassed twice by freeze thaw cycles. The dark red solution was stirred at 80 °C for 36h. Phenyl boronic acid was added under nitrogen and the reaction was continued for other 12h. The brown sticky mixture was cooled to room temperature. The mixture was extracted with CHCl<sub>3</sub>, washed with 100 mL water thrice and dried over anh. MgSO<sub>4</sub>. The solution was concentrated to 5 mL and dropped in 50 mL methanol. The brown color precipitate was filtered and washed with methanol twice (0.082 g, Yield 85%) <sup>1</sup>H NMR (400 MHz, CDCl<sub>3</sub>, δ ppm): 8.85 (br, m, 2H), 7.6 (br, m, 2H), 4.15 (br, m, 4H), 1.7 (br, m, 4H), 1.2 (br, m, 60H), 0.85 (br, m, 6H); <sup>13</sup>C NMR (150 MHz, CDCl<sub>3</sub>, δ ppm): 163.07, 135.42, 132.18, 131.10, 129.98, 129.06, 124.68, 124.19, 41.14-14.33 (Aliphatic Carbons); GPC: Mn: 5171; Mw: 6627; PDI: 1.74.

**Synthesis of Br<sub>2</sub>-PDIOD:** A mixture of PTCDA-Br<sub>2</sub> (0.4 g, 0.72 mmol) (*Precaution: The dibromination of PTCDA by bromine in concentrated H<sub>2</sub>SO<sub>4</sub> and must be handled with great care*), octadecylamine (0.58 g, 2.18 mmol), o-xylene (3 mL), and propionic acid (1 mL) were stirred at 140 °C for 6h. After cooling to room temperature the solvents were removed in vacuo and the product was purified by column chromatography on silica gel, using a mixture of chloroform: hexane (1:2, v/v) as eluent, yielding red color solid as product (0.49 g, yield 65%). <sup>1</sup>H NMR (600 MHz, CDCl<sub>3</sub>, δ ppm): 9.47 (d, J = 8.0 Hz, 2H), 8.90 (s, 2H), 8.69 (d, J = 8.0 Hz, 2H), 4.184 (t, 4H), 1.729 (m, 4H), 1.25-1.42 (m, 60H), 0.853 (t, 6H); <sup>13</sup>C NMR (150MHz, CDCl<sub>3</sub>, δ ppm): 163.08, 162.57, 138.20, 133.18, 133.02, 130.21, 129.47, 128.71, 127.16, 123.43, 123.00, 120.99, 41.05-14.32 (Aliphatic Carbons); MALDI-TOF: m/z calcd. 1053.44, found, [M+2H]<sup>+</sup> : 1055.47; Elemental Analysis Calcd. C, 68.43; H, 7.66; N, 2.66; found, C, 68.33; H, 7.19; N, 1.84.

**Synthesis of PDI-Ph:** To a three neck round bottom flask Br<sub>2</sub>-PDIOD (0.1 g, 0.095 mmol) and benzene-1, 4-diboronic acid (15.7mg, 0.0949mmol) were added and degassed thrice by freeze thaw cycles. Aqueous solution of K<sub>2</sub>CO<sub>3</sub> (0.131 g, 0.949 mmol) in 2 mL deoxygenated water were added under nitrogen. (0.0054 mg, 0.004 mmol) of Pd(PPh<sub>3</sub>)<sub>4</sub>, two drops of aliquat and 6 mL THF were added under nitrogen atmosphere, degassed thrice by freeze thaw cycles. The dark red solution was stirred at 80 °C for 36h. Phenyl boronic acid was added under nitrogen and the reaction was continued for other 12h. The brown sticky mixture was cooled to room temperature. The mixture was extracted with CHCl<sub>3</sub>, washed with 100 mL water thrice and dried over anh. MgSO<sub>4</sub>. The solution was concentrated to 5 mL and dropped in 50 mL methanol. The precipitate was filtered and washed with methanol twice to get black color solid. (0.076 g, Yield 83%) <sup>1</sup>H NMR (600MHz, CDCl<sub>3</sub>, δ ppm): 8.57 (br, m, 2H), 8.30 (br, m, 4H), 7.69 (br, m, 2H), 4.1-4.4 (br, m, 4H), 1.67 (br, m, 4H), 1.2 (br, m, 60H), 0.86 (br, m, 6H); <sup>13</sup>C NMR (150 MHz, CDCl<sub>3</sub>, δ ppm): 163.49, 163.18, 136.50, 135.50, 134.61, 133.88, 132.30, 131.45, 129.14, 128.70, 126.45, 124.50, 123.46, 123.22, 40.97-14.16 (Aliphatic Carbons); GPC: Mn: 16082; Mw: 24657; PDI: 1.53.

**Synthesis of PDI-BT:** To a three neck round bottom flask Br<sub>2</sub>-PDIOD (0.1 g, 0.095 mmol), 2,1,3-benzothiadiazole bisboronic ester (0.037 g, 0.0949 mmol), were added and degassed thrice by freeze thaw cycles. Aqueous solution of K<sub>2</sub>CO<sub>3</sub> (0.131 g, 0.949 mmol) in 2 mL deoxygenated water were added under nitrogen. (0.0054 g, 0.004 mmol) of Pd(PPh<sub>3</sub>)<sub>4</sub>, two drops of aliquat and 6 mL THF were added under nitrogen atmosphere, degassed thrice by freeze thaw cycles. The

dark red solution was stirred at 80 °C for 36h. Phenyl boronic acid was added under nitrogen and the reaction was continued for other 12h. The brown sticky mixture was cooled to room temperature. The mixture was extracted with  $\text{CHCl}_3$ , washed with 100 mL water thrice and dried over anhydrous  $\text{MgSO}_4$ . The solution was concentrated to 5 mL and dropped in 50 mL methanol. The precipitate was filtered and washed with methanol twice to get black color solid. (0.084 g, Yield 86%).  $^1\text{H}$  NMR (600 MHz,  $\text{CDCl}_3$ ,  $\delta$  ppm): 8.76 (br, m, 2H), 8.10 (br, m, 4H), 7.83 (br, m, 2H), 4.1-4.4 (br, m, 4H), 1.67 (br, m, 4H), 1.2 (br, m, 60H), 0.86 (br, m, 6H);  $^{13}\text{C}$  NMR (150 MHz,  $\text{CDCl}_3$ ,  $\delta$  ppm): 163.46, 163.23, 136.19, 134.54, 133.04, 132.31, 132.00, 131.80, 131.43, 129.07, 128.52, 127.79, 124.19, 123.24, 40.99-14.31 (Aliphatic Carbons); GPC: Mn: 30619 Da; Mw: 35739 Da; PDI: 1.16.

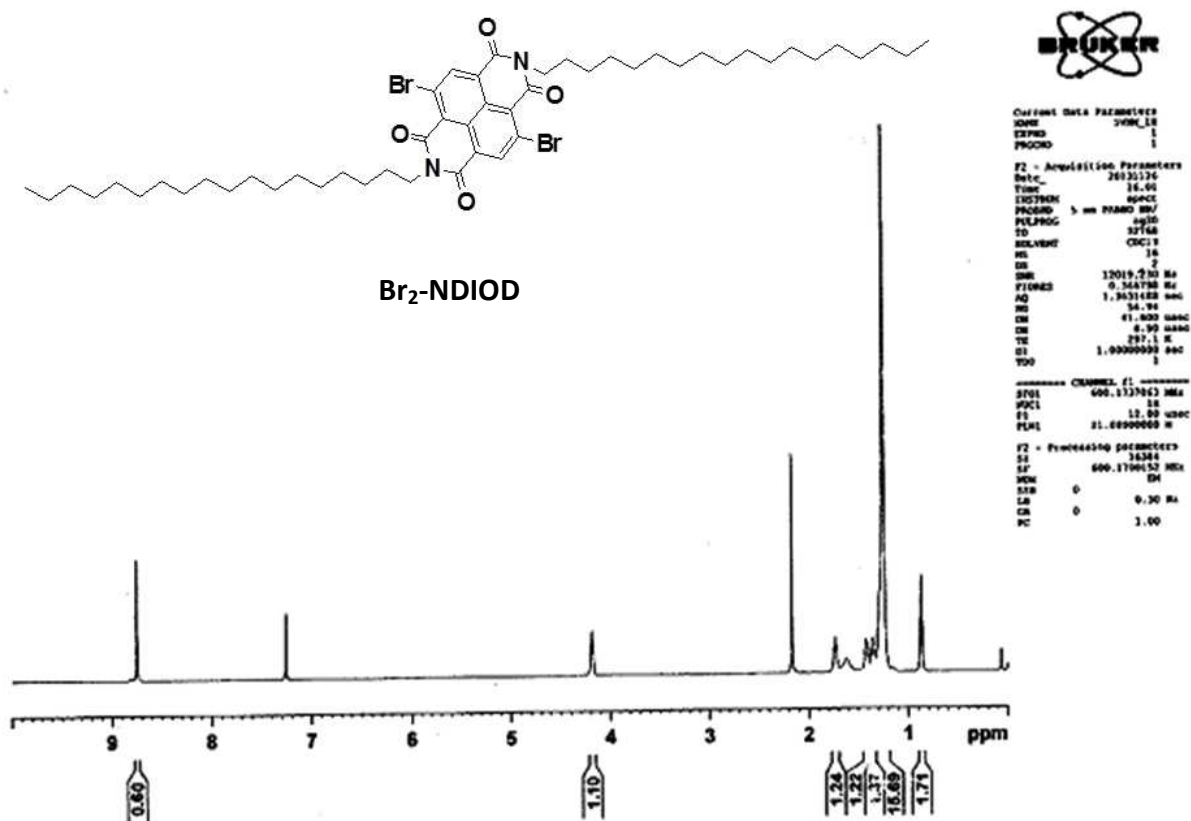

Figure S1:  $^1\text{H}$  NMR Spectra of Br<sub>2</sub>-NDIOD ( $\text{CDCl}_3$ , 600MHz)

SV-NM-Di1\_13C

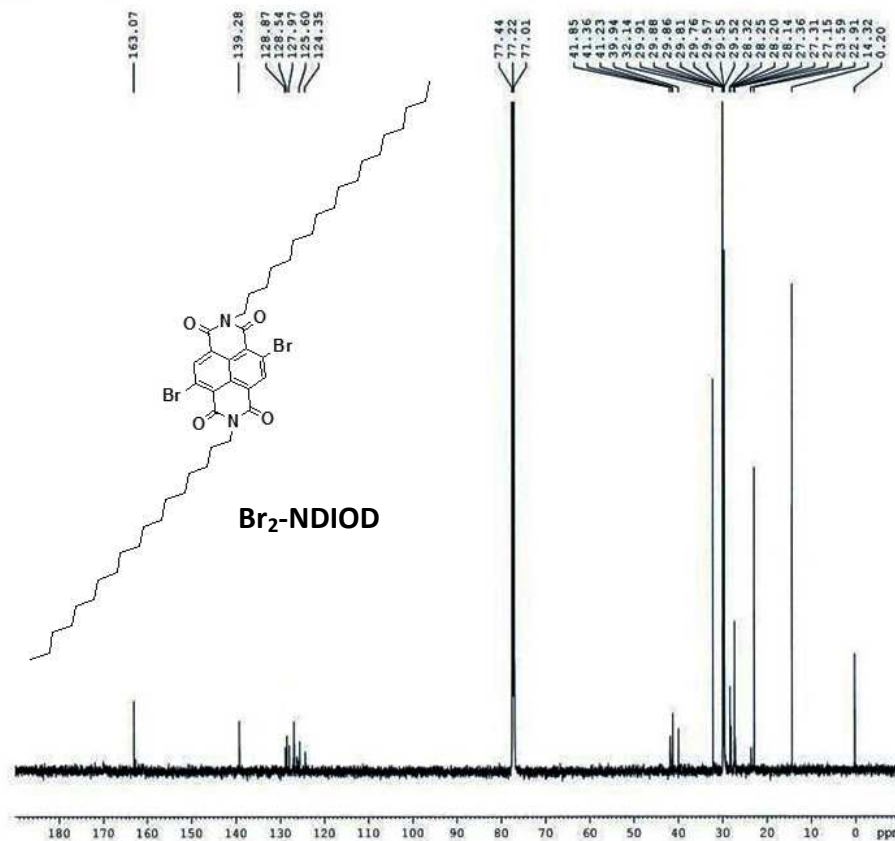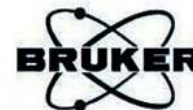

Current Data Parameters  
NAME SV-NM-Di1\_13C  
EXPNO 1  
PROCNO 1

F2 - Acquisition Parameters  
Date\_ 20140426  
Time\_ 23.08  
INSTRUM spect  
PROBHD 5 mm PABBO BB/  
PULPROG zgpg30  
TD 32768  
SOLVENT CDCl3  
NS 9670  
DS 2  
SWH 36057.691 Hz  
FIDRES 1.100393 Hz  
AQ 0.4543829 sec  
RG 65.24  
DW 13.867 usec  
DE 6.50 usec  
TE 301.7 K  
D1 2.00000000 sec  
D11 0.03000000 sec  
TDO 1

===== CHANNEL f1 =====  
SFO1 150.9279571 MHz  
NUC1 13C  
P1 10.50 usec  
PLW1 95.00000000 W

===== CHANNEL f2 =====  
SFO2 600.1724007 MHz  
NUC2 1H  
CPDPRG[2] waltz16  
PCPD2 70.00 usec  
PLW2 21.00000000 W  
PLW12 0.61714000 W  
PLW13 0.30239999 W

F2 - Processing parameters  
SI 16384  
SF 150.9128322 MHz  
WDW EM  
SSB 0  
LB 1.00 Hz  
GB 0  
PC 1.40

Figure S2: <sup>13</sup>C NMR Spectra of Br<sub>2</sub>-NDIOD (CDCl<sub>3</sub>, 150 MHz)

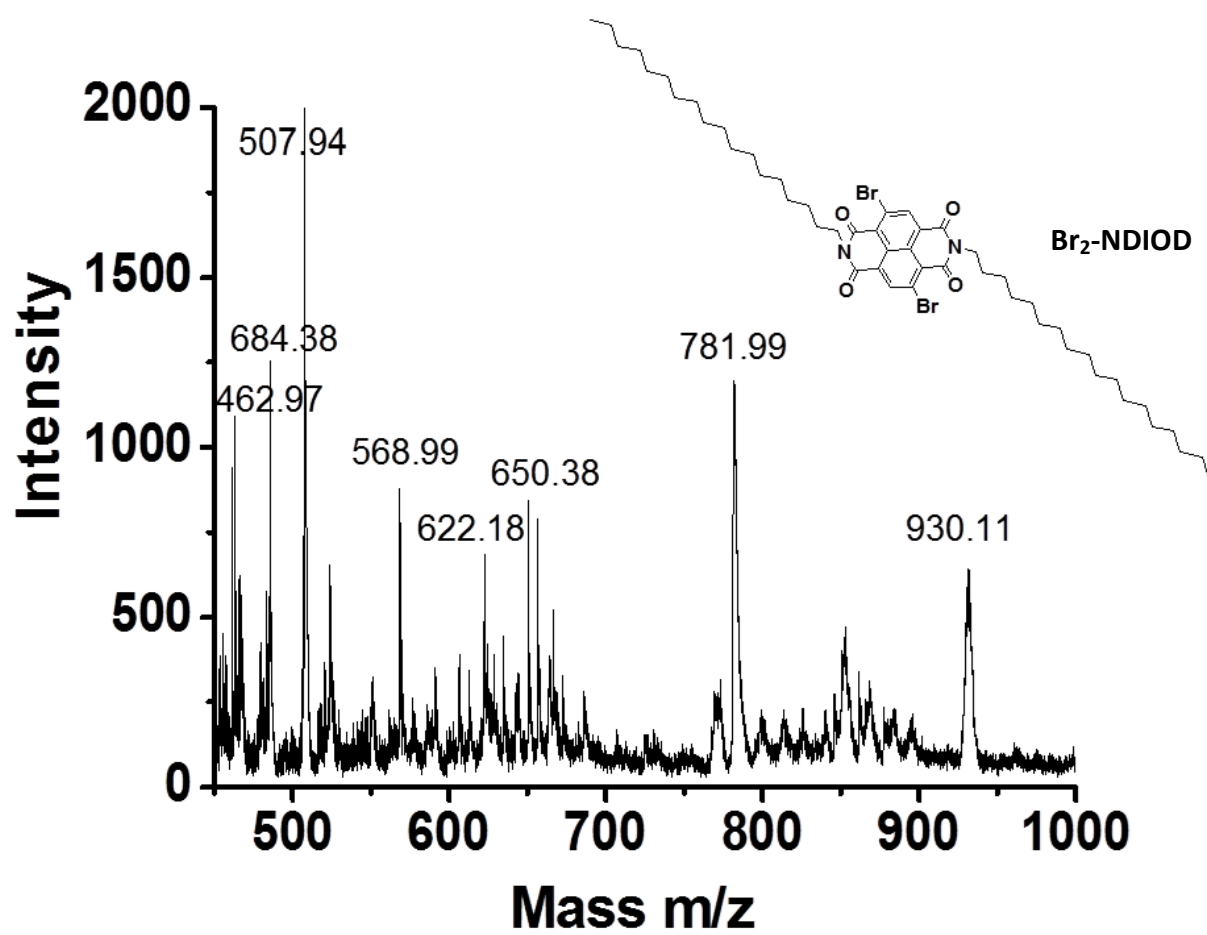

Figure S3: MALDI-TOF Spectra of Br<sub>2</sub>-NDIOD



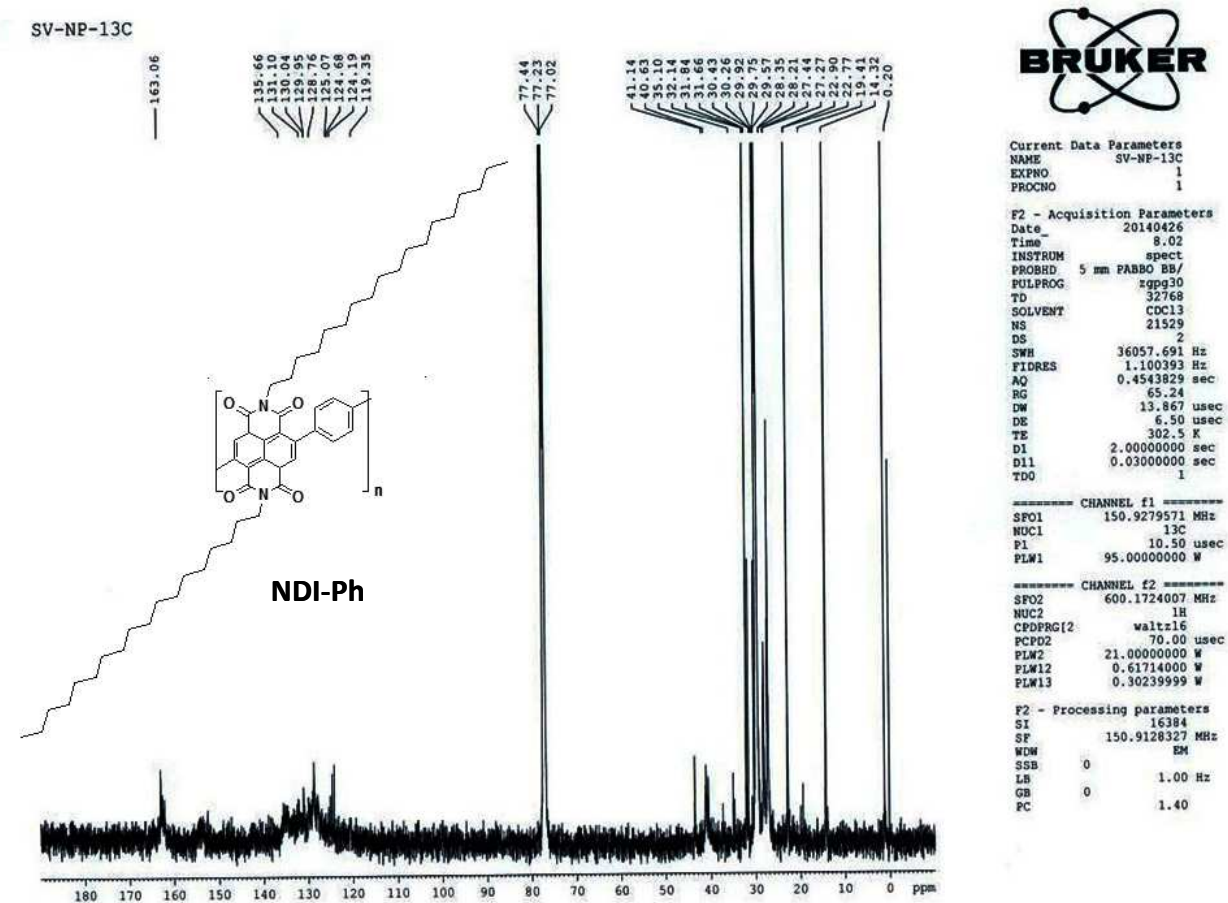

Figure S5:  $^{13}\text{C}$  NMR Spectra of NDI-Ph ( $\text{CDCl}_3$ , 150 MHz)



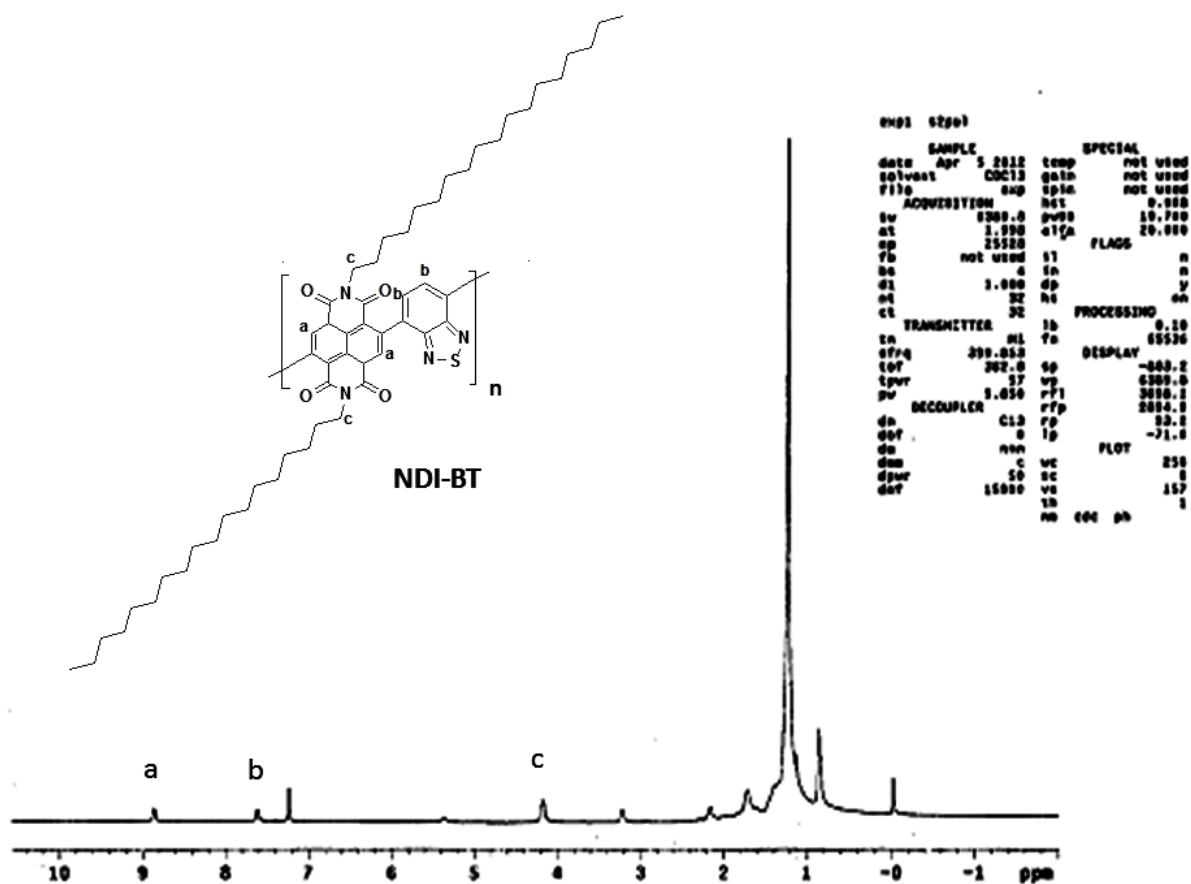

Figure S6:  $^1\text{H}$  NMR Spectra of NDI-BT ( $\text{CDCl}_3$ , 400 MHz)

SV-NB-2-13C

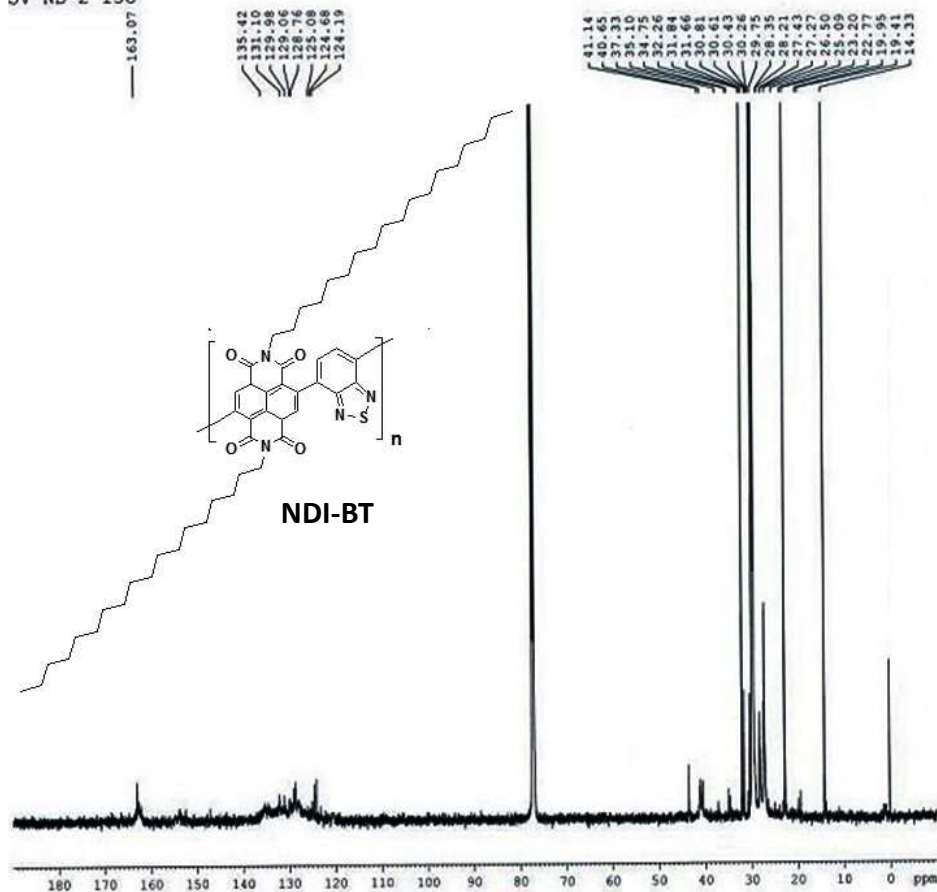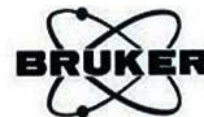

Current Data Parameters  
 NAME SV-NB-2-13C  
 EXPNO 1  
 PROCNO 1

F2 - Acquisition Parameters  
 Date\_ 20140427  
 Time 6.01  
 INSTRUM spect  
 PROBHD 5 mm PABBO BB/  
 PULPROG zgpg30  
 TD 32768  
 SOLVENT CDCl3  
 NS 38120  
 DS 2  
 SWH 36057.691 Hz  
 FIDRES 1.100393 Hz  
 AQ 0.4543829 sec  
 RG 65.24  
 DW 13.867 usec  
 DE 6.50 usec  
 TE 302.1 K  
 D1 2.00000000 sec  
 D11 0.03000000 sec  
 TD0 1

----- CHANNEL f1 -----  
 SFO1 150.9279571 MHz  
 NUC1 13C  
 P1 10.50 usec  
 PLW1 95.00000000 W

----- CHANNEL f2 -----  
 SFO2 600.1724007 MHz  
 NUC2 1H  
 CPDPRG2 waltz16  
 PCPD2 70.00 usec  
 PLW2 21.00000000 W  
 PLW12 0.61714000 W  
 PLW13 0.30239999 W

F2 - Processing parameters  
 SI 16384  
 SF 150.9128325 MHz  
 WDW EM  
 SSB 0  
 LB 1.00 Hz  
 GB 0  
 PC 1.40

Figure S7:  $^{13}\text{C}$  NMR Spectra of NDI-BT ( $\text{CDCl}_3$ , 150 MHz)

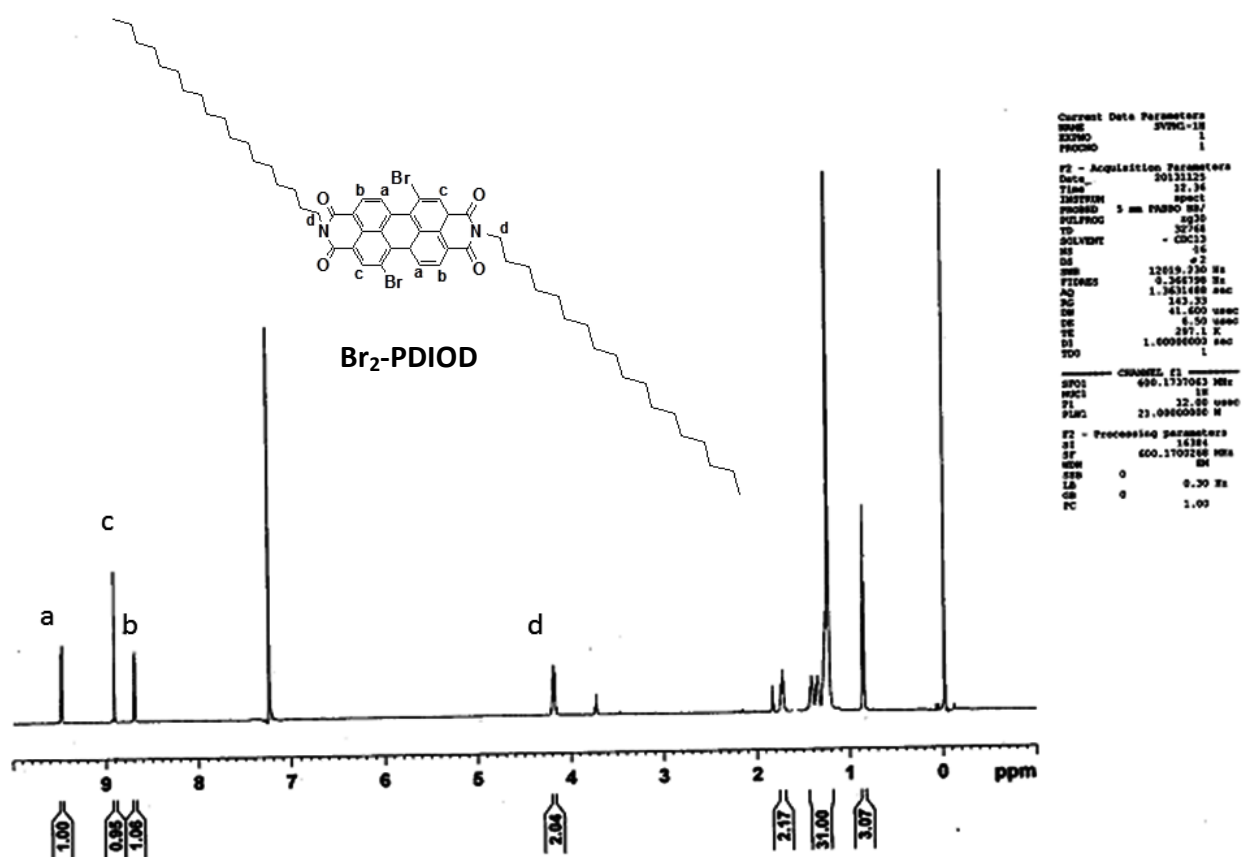

Figure S8: <sup>1</sup>H NMR Spectra of Br<sub>2</sub>-PDIOD (CDCl<sub>3</sub>, 600 MHz)

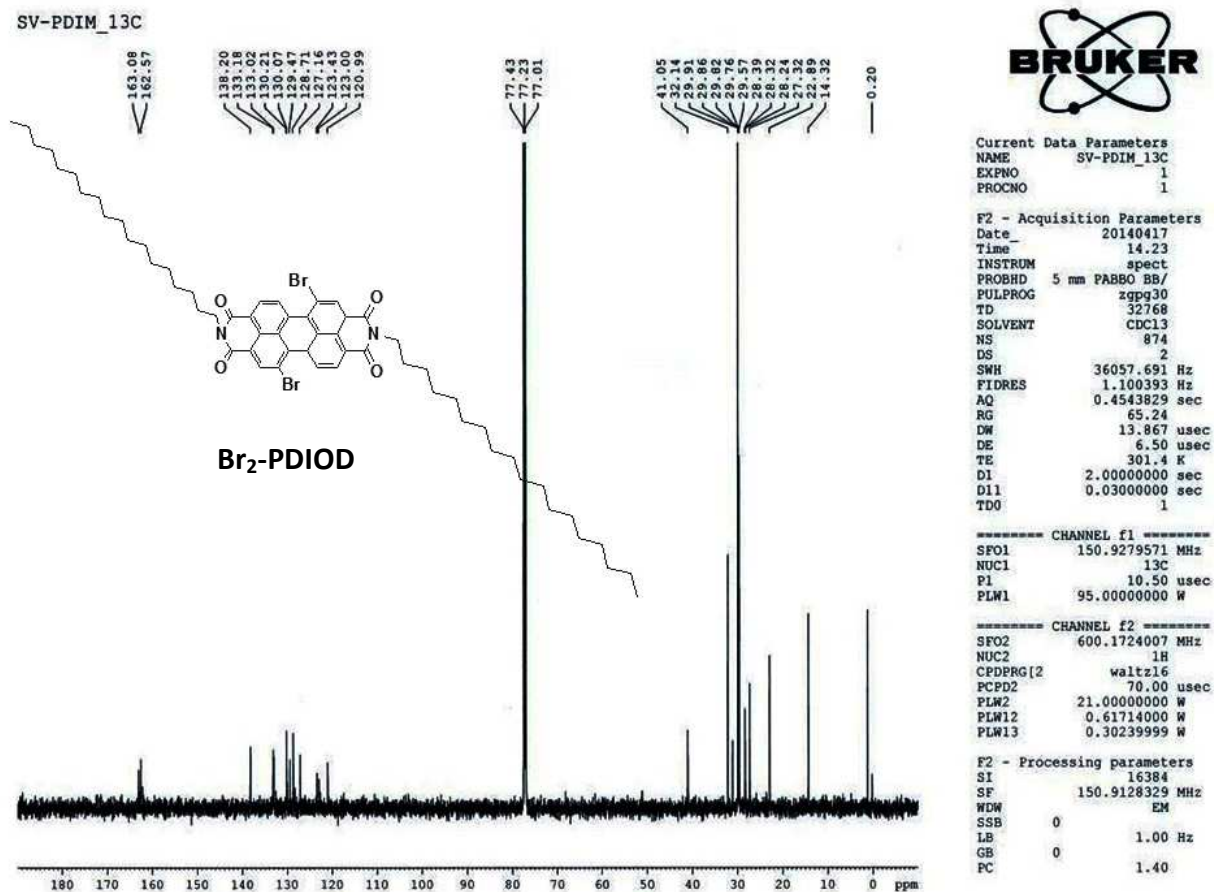

Figure S9: <sup>13</sup>C NMR Spectra of Br<sub>2</sub>-PDIOD (CDCl<sub>3</sub>, 150 MHz)

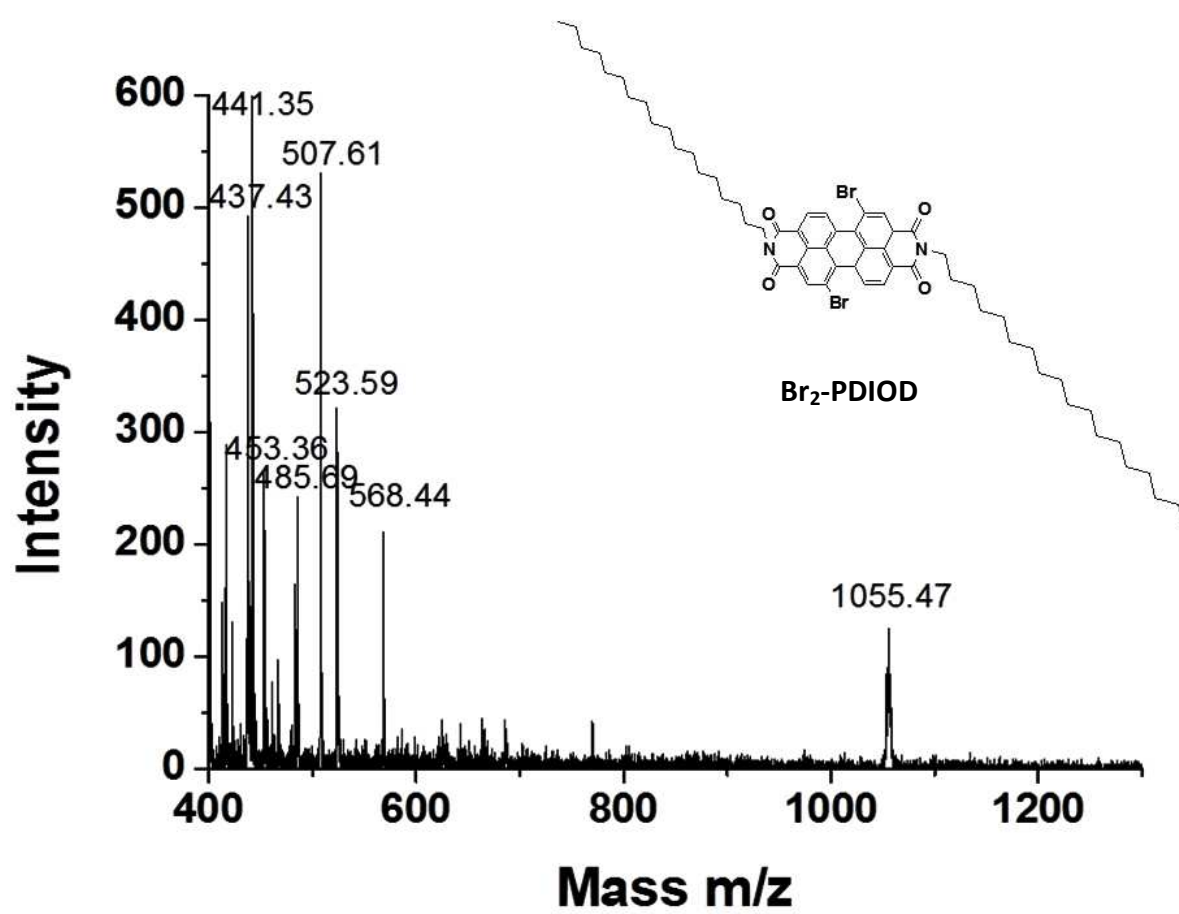

Figure S10: MALDI-TOF Spectra of Br<sub>2</sub>-PDIOD



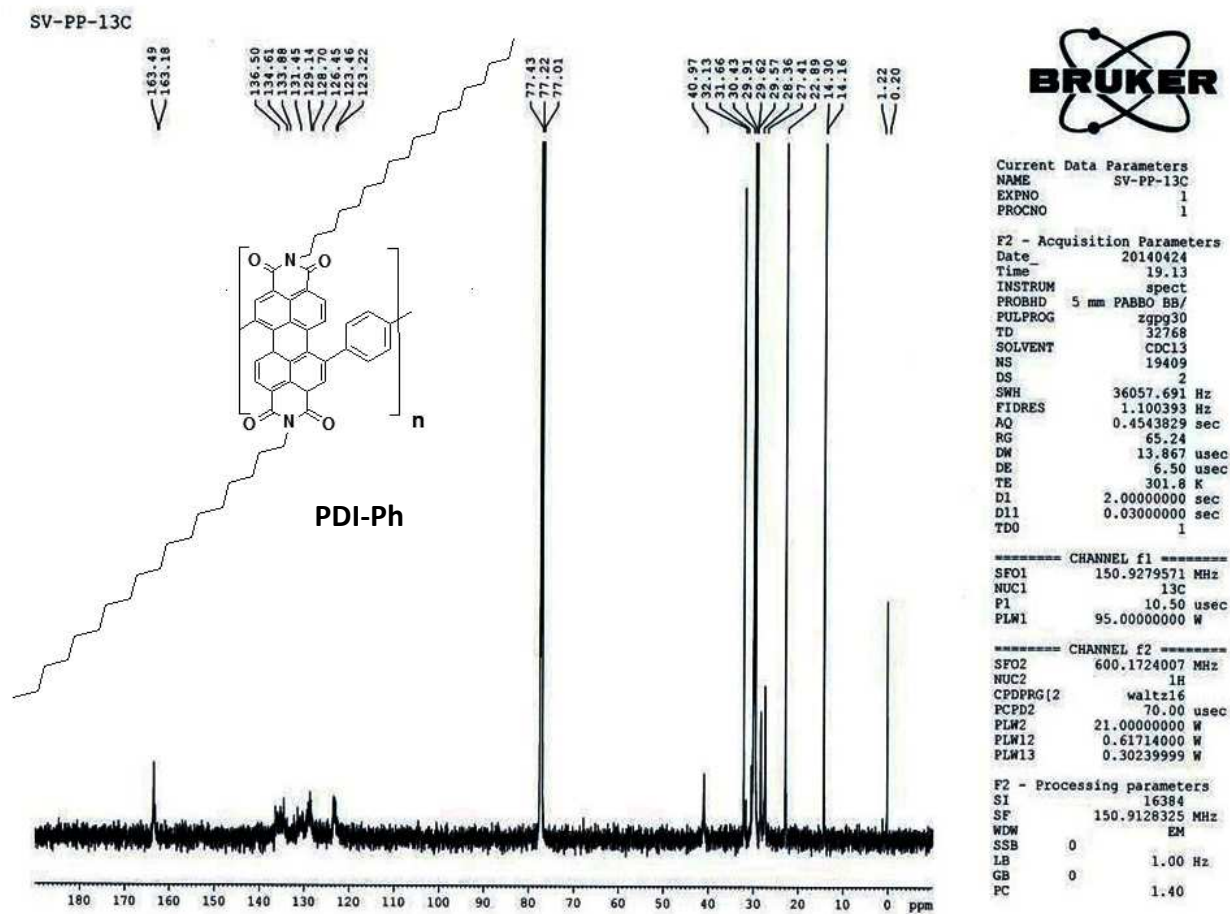

Figure S12: <sup>13</sup>C NMR Spectra of PDI-Ph (CDCl<sub>3</sub>, 150 MHz)

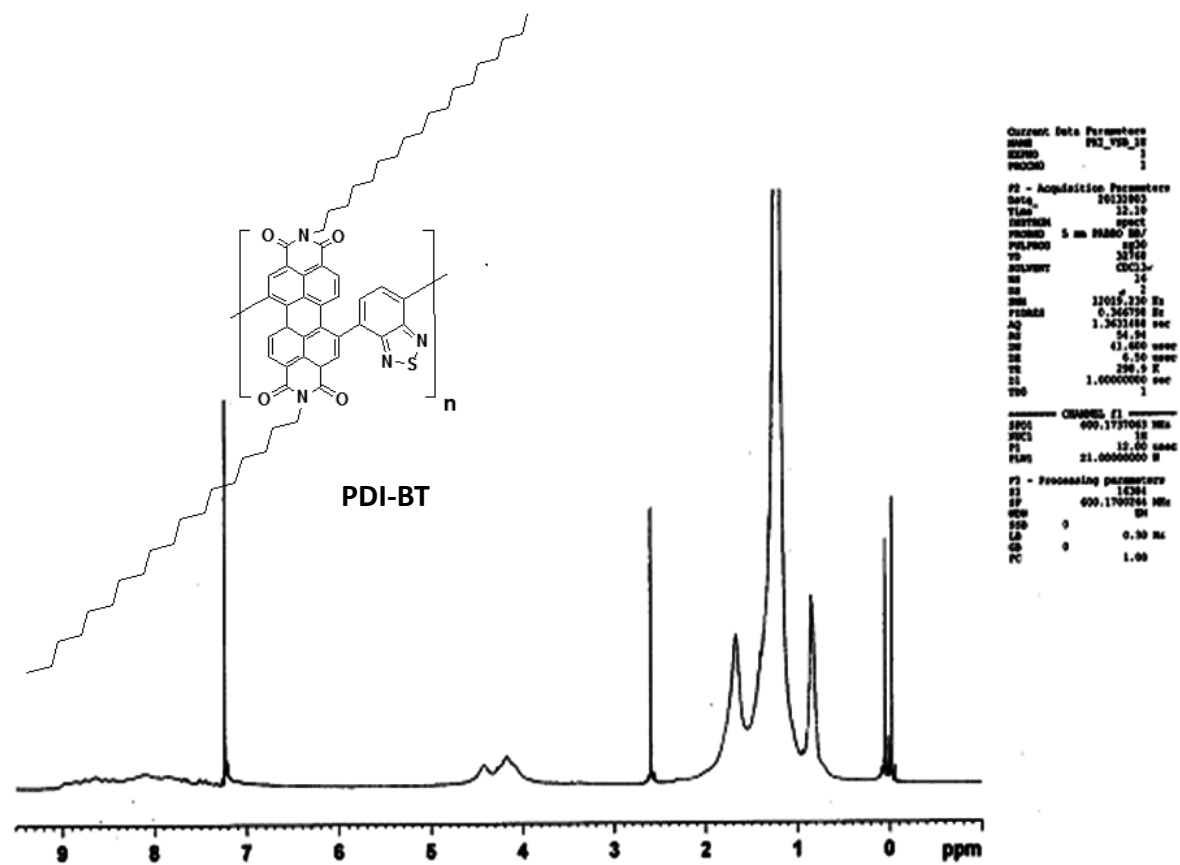

Figure S13:  $^1\text{H}$  NMR Spectra of PDI-BT polymer ( $\text{CDCl}_3$ , 600 MHz)



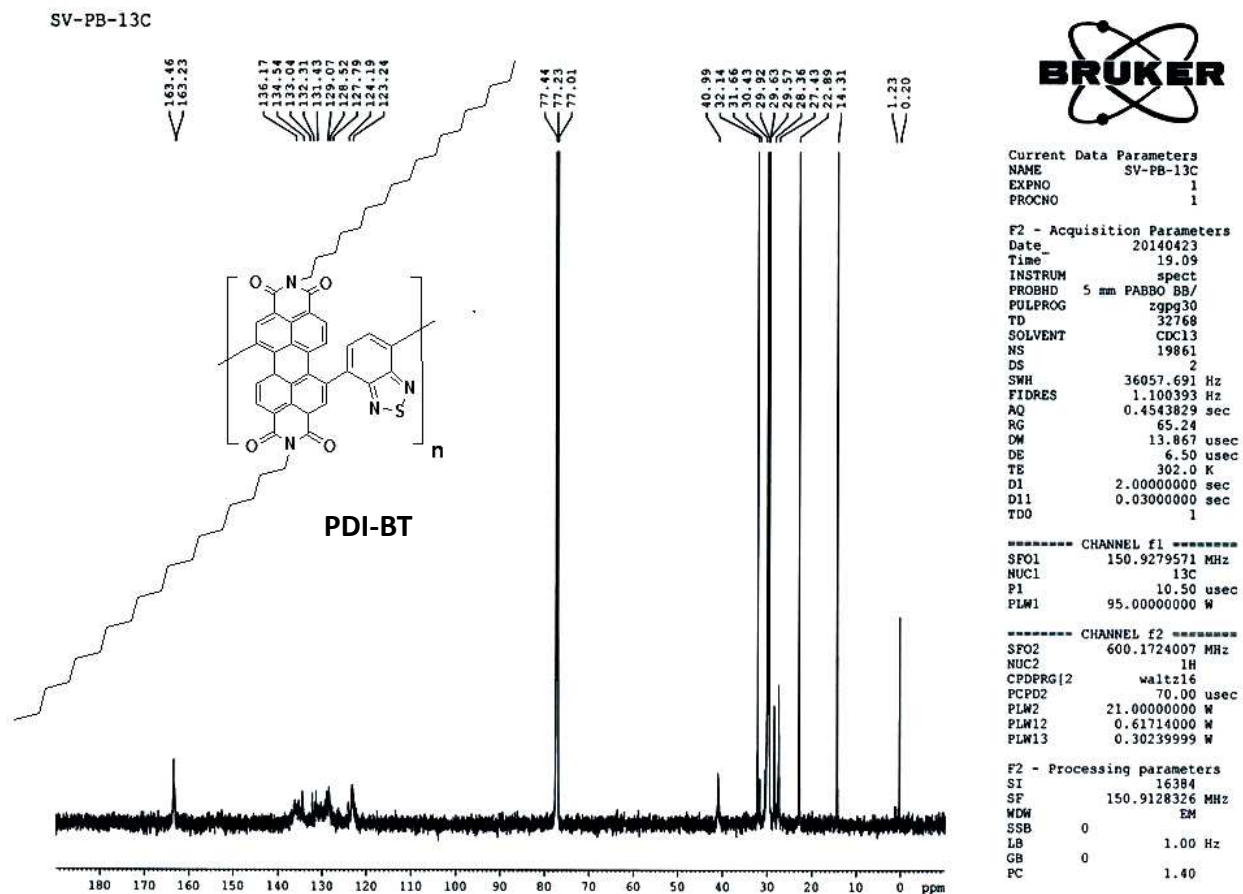

Figure S14:  $^{13}\text{C}$  NMR Spectra of PDI-BT ( $\text{CDCl}_3$ , 150 MHz)

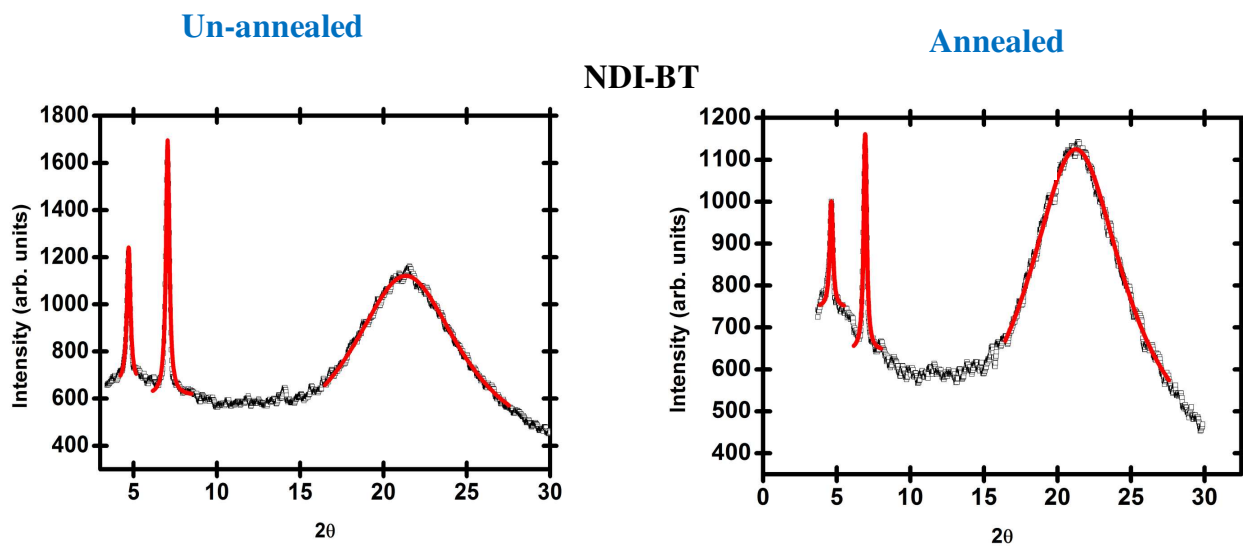

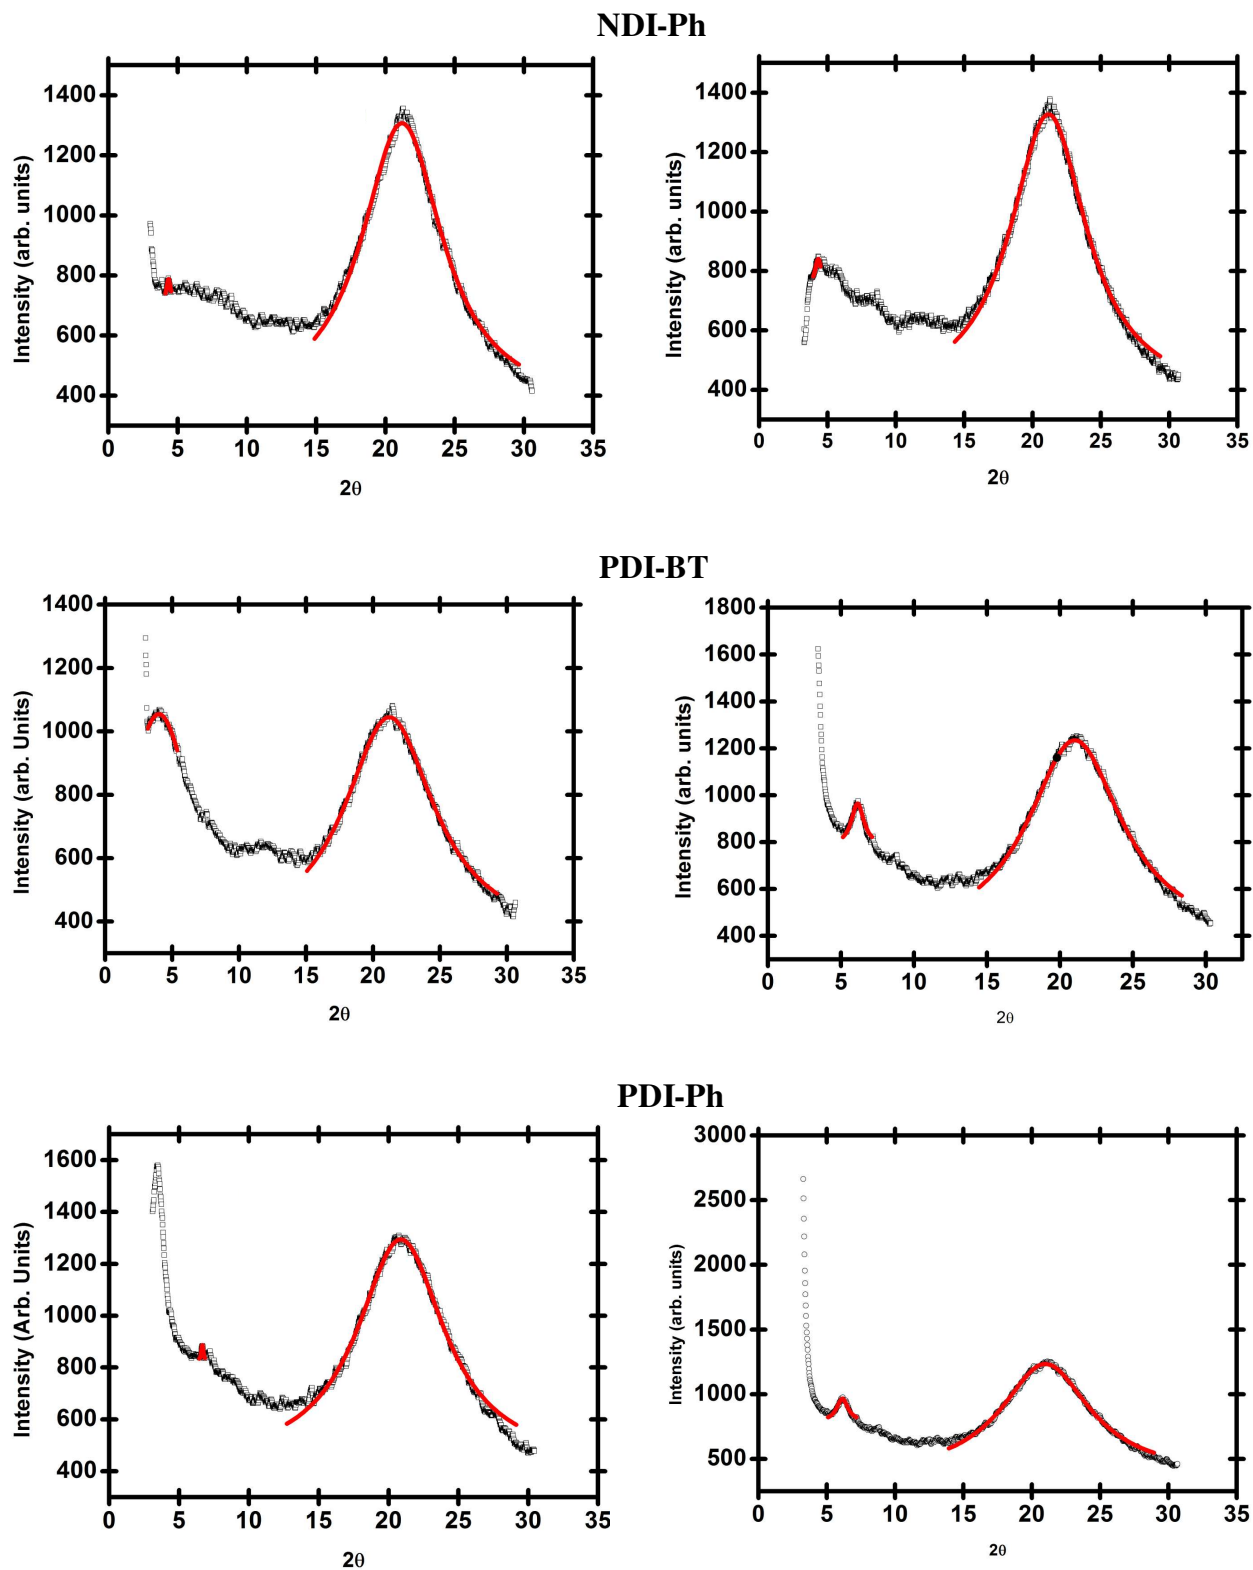

Figure S15: XRD spectra of the annealed (right side) and as spun (left side) polymer films fitted with Lorentzian to correctly estimate the peaks.

|          |               | As cast films | Annealed Films |
|----------|---------------|---------------|----------------|
| Polymers | (00n)         | FWHM          | FWHM           |
| NDI-Ph   | (001)         | 0.3326        | 0.5331         |
|          | $\pi$ - $\pi$ | 7.1387        | 6.8727         |
| NDI-BT   | (001)         | 0.2542        | 0.2526         |
|          | (002)         | -             | -              |
|          | $\pi$ - $\pi$ | 8.0554        | 7.9907         |
| PDI-Ph   | (001)         | -             | -              |
|          | (002)         | 1.0112        | 0.713          |
|          | $\pi$ - $\pi$ | 7.9777        | 7.6657         |
| PDI-BT   | (001)         | -             | -              |
|          | (002)         | 7.1364        | 1.0482         |
|          | $\pi$ - $\pi$ | 8.2268        | 7.9777         |

Table S1: Table showing the variation in the FWHM of the XRD spectra with annealing of the polymer films.

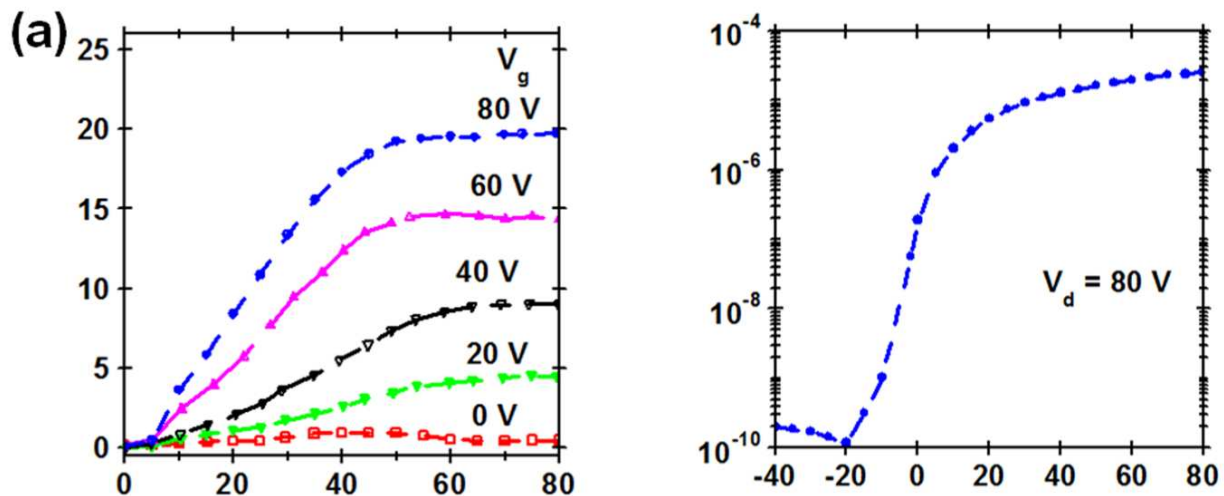

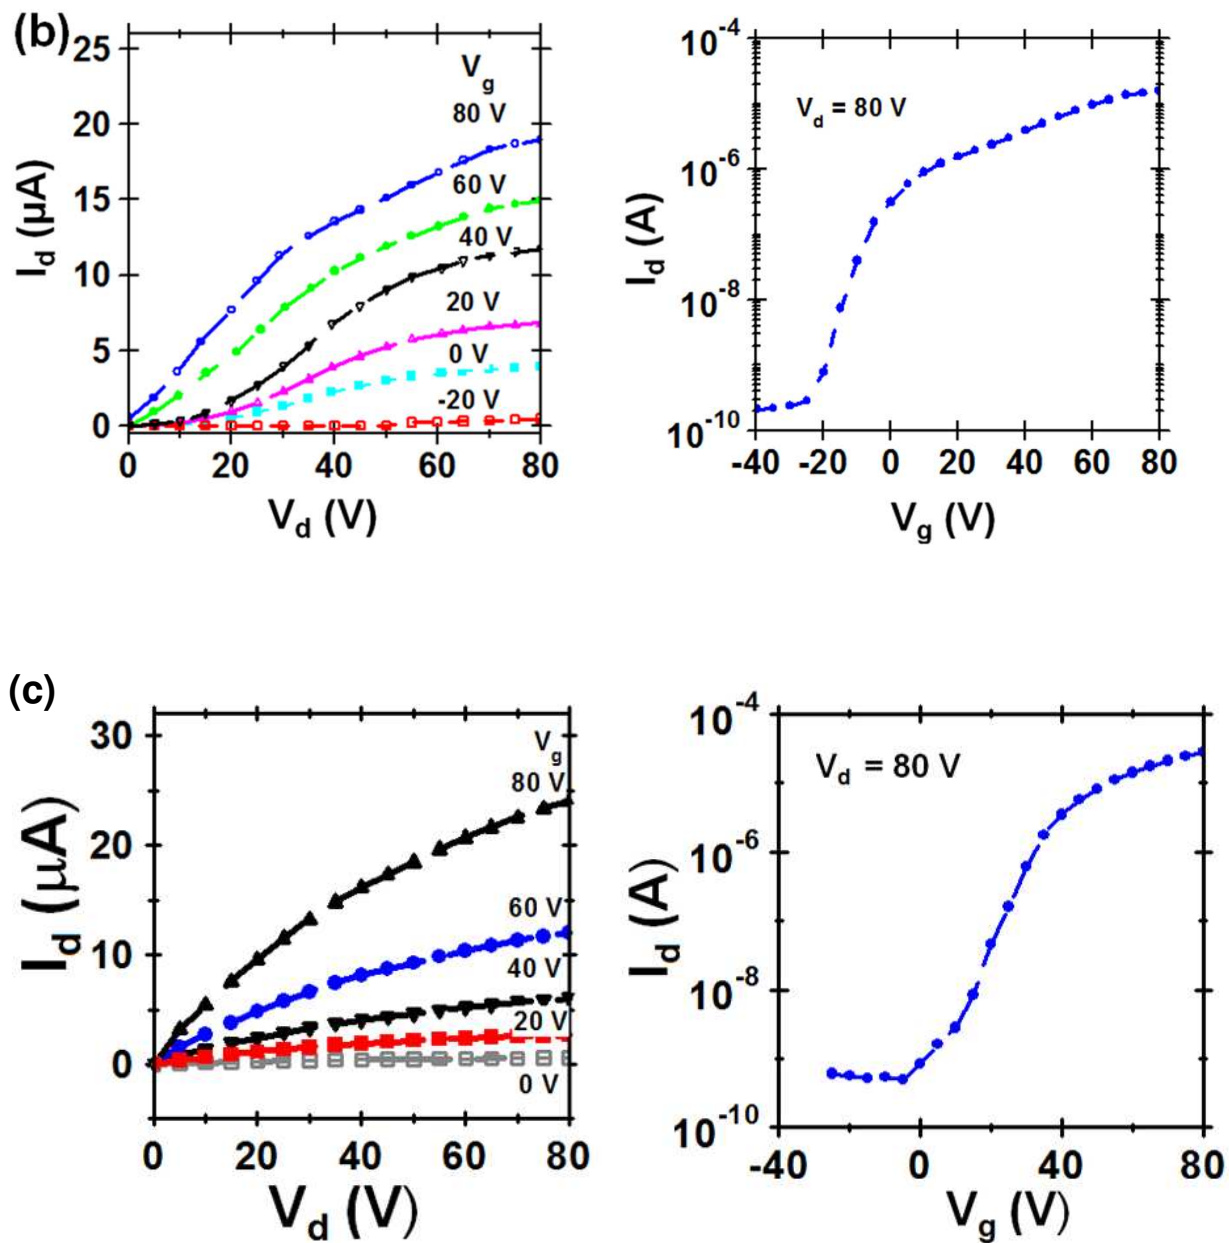

Figure S16: Typical output and transconductance characteristics for FETs fabricated with (a) NDI-BT; (b) PDI-BT and (c) N2200. Typical BCB dielectric capacitance ( $C_i \sim 2 - 4$  nF/cm<sup>2</sup>) and device dimensions are  $W \approx 1$  mm and  $L \approx 60$ -100  $\mu\text{m}$ .

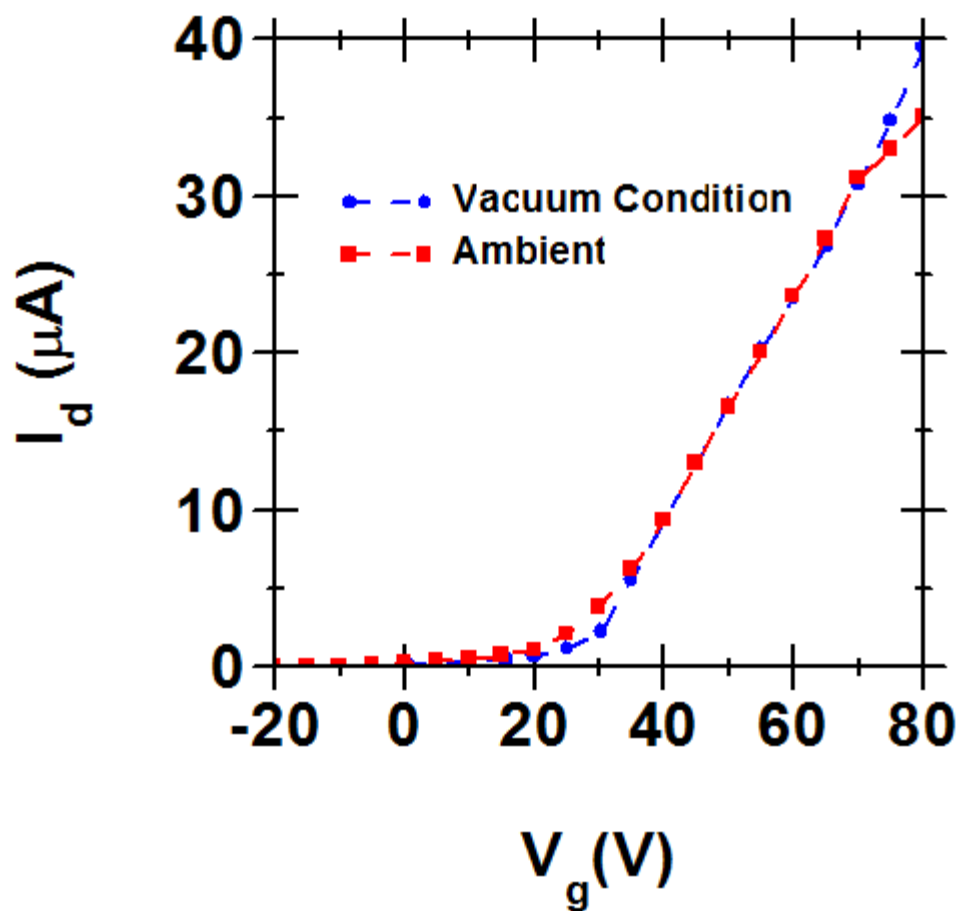

Figure S17: Typical transconductance characteristics for FETs fabricated with NDI-Ph polymer. Typical BCB dielectric capacitance ( $C_i \sim 2 - 4 \text{ nF/cm}^2$ ) and device dimensions are  $W \approx 1 \text{ mm}$  and  $L \approx 100 \text{ }\mu\text{m}$ .
